# Supplementary material
Source: publisher figshare collection journal article supplement (https://acs.figshare.com/ndownloader/files/4141522)
Supplement: Supplementary file 1 [file 4141522]

## **Supporting Information**

### **Pore-scale characterization of biogeochemical controls on iron and uranium speciation under flow conditions**

Pearce, C. I.<sup>1\*</sup>, Wilkins, M. J.<sup>1</sup>, Zhang, C.<sup>1</sup>, Heald, S. M.<sup>2</sup>, Fredrickson, J. K.<sup>1</sup> and Zachara, J. M.<sup>1</sup>

<sup>1</sup> Pacific Northwest National Laboratory, Richland, WA 99352, USA

<sup>2</sup> Argonne National Laboratory, Argonne, IL 60439, USA

Journal: Environmental Science & Technology

Contents:

No. of pages: 3

No. of Tables: 0

No. of Figures: 2

Date prepared: June 8, 2012

---

\*Corresponding author: MS K8-96, Phone (509)371-6380

E-mail: [carolyn.pearce@pnnl.gov](mailto:carolyn.pearce@pnnl.gov)

### Micromodel Fabrication.

The micromodel was fabricated in a silicon wafer involving the following steps: first, the micromodel design pattern including a  $2 \times 1 \text{ cm}^2$  pore network with grain diameters of  $300 \text{ }\mu\text{m}$ , pore spaces of  $180 \text{ }\mu\text{m}$ , pore throats of  $35 \text{ }\mu\text{m}$ , two inlet and an outlet channels (Figure S1) were prepared in AutoCAD and printed to a soda lime photomask. A prime grade silicon wafer  $100 \text{ mm}$  in diameter,  $500 \text{ }\mu\text{m}$  in thickness (Virginia Semiconductor Inc., Fredericksburg, VA) spin coated with a thin photoresist (PR) layer was placed under the photomask and exposed to UV light for  $20 \text{ s}$ . The area of PR exposed to UV was weakened and removed by a developer solution; the unexposed PR remained on the surface protecting the area underneath. Next, the exposed area of silicon wafer was etched to  $35 \text{ }\mu\text{m}$  depth by inductively coupled plasma-deep reactive ion etching (ICP-DRIE) method. The remaining PR was removed using a PR stripping solution. The inlet and outlet ports were drilled through the wafer using a  $1.25 \text{ mm}$  diameter diamond plated press drill. The finished wafer was thoroughly cleaned using acetone, isopropanol, a piranha solution ( $\text{H}_2\text{SO}_4$ :  $30\% \text{ H}_2\text{O}_2$  in  $3:1$  ratio) and deionized (DI) water. To seal the flow channel, an anodic bonding method was used to bond the wafer to a Pyrex glass wafer  $100 \text{ mm}$  in diameter and  $500 \text{ }\mu\text{m}$  in thickness (Sensor Prep Service, Elburn, IL). Finally, nanoport connectors (IDEX, Oak Harbor, WA) were attached to all inlet and outlet ports on the back side of silicon using epoxy adhesive through a thermal bonding procedure. The micromodel was cleaned using a basic solution ( $\text{NH}_4\text{OH}:\text{H}_2\text{O}_2:\text{H}_2\text{O} = 1:1:5$ ) prior to use.

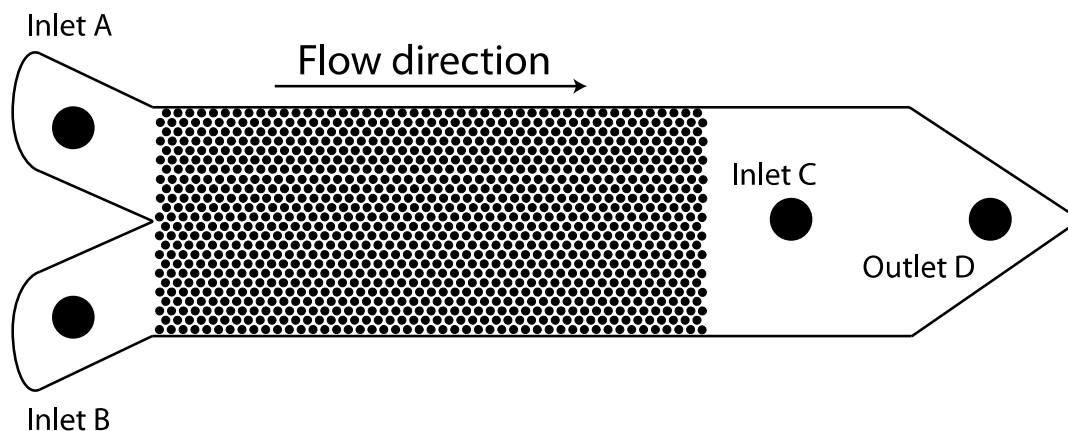

Figure S1. Schematic of the micromodel setup, with two inlet ports (A and B) generating a mixing zone down the center of the homogeneous pore network. Port C was used as an inlet for acid injection during Fe(III) precipitation and port D was the outlet.

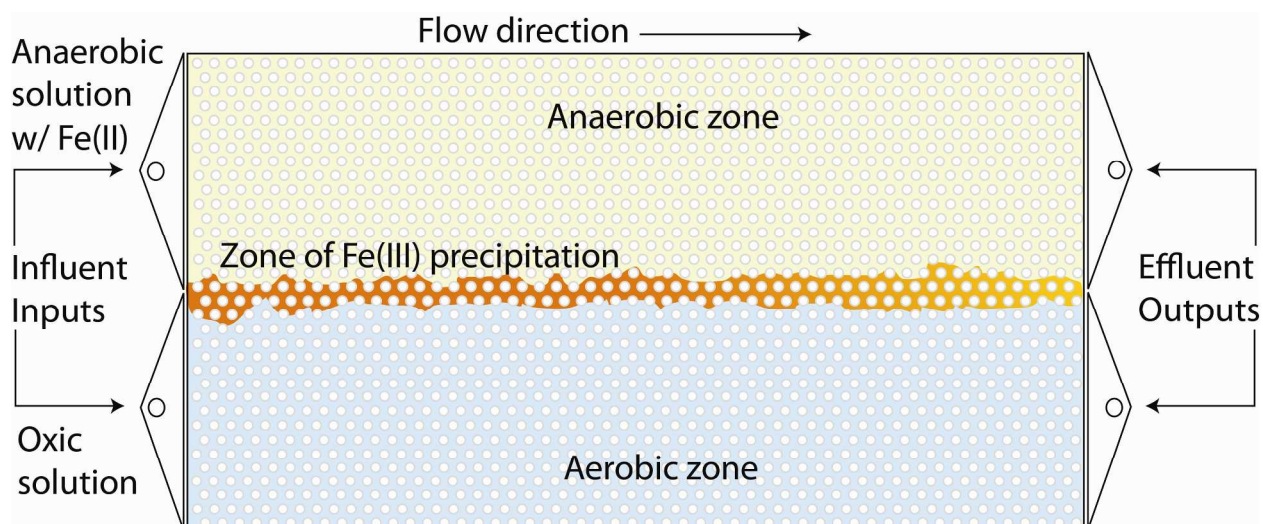

Figure S2. Schematic of Fe(III)-oxide mineral precipitation; Anaerobic synthetic ground water containing  $\text{FeCl}_2 \cdot 4\text{H}_2\text{O}$  (15mM) was added through on inlet and oxic synthetic ground water was added through the other inlet generating a zone of Fe(III) precipitation down the center of the homogeneous pore network. The transverse width of precipitate was limited by the extent of transverse mixing.
